# Supplementary material
Source: publisher figshare collection journal article supplement (https://frontiersin.figshare.com/ndownloader/files/21957441)
Supplement: Supplementary file [file 21957441]

*Supplementary Figure 5*

## **Prominence of IL6, IGF, TLR and bioenergetics pathway perturbation in lung tissues of scleroderma patients with pulmonary fibrosis**

**Ludivine Renaud<sup>1</sup>, Willian A. da Silveira<sup>2</sup>, Naoko Takamura<sup>1</sup>, Gary Hardiman<sup>2</sup>, Carol Feghali-Bostwick<sup>1\*</sup>**

<sup>1</sup> Department of Medicine, Medical University of South Carolina, Charleston, SC, USA.

<sup>2</sup> School of Biological Sciences and Institute for Global Food Security, Queens University Belfast, Belfast BT9 5AG, UK.

**\* Correspondence:**

Dr. Carol Feghali-Bostwick  
feghalib@musc.edu

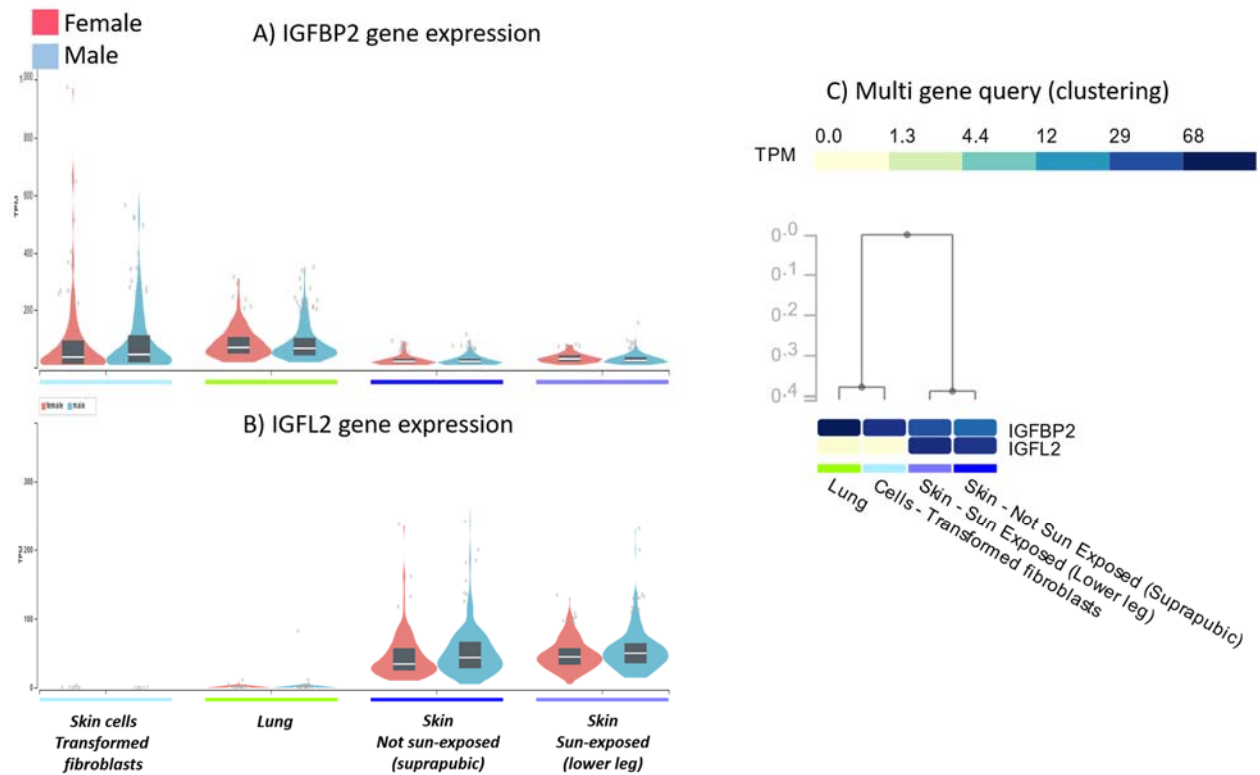

**Supplementary Figure 5:** IGFBP2 and IGFL2 gene expression in skin fibroblasts, lung and skin. (A) by gender, (B) multi gene query that shows clustering. Figures generated by GTEx portal. TPM (Transcripts Per Kilobase Million).
